1 **Title: Rate of photosynthetic acclimation to fluctuating light varies widely**  
2 **among genotypes of wheat**

3

4 **Running title: Variation in photosynthetic acclimation kinetics in wheat**

5

6 William T. Salter<sup>1</sup> ([william.salter@sydney.edu.au](mailto:william.salter@sydney.edu.au))

7 Andrew M. Merchant<sup>1</sup> ([andrew.merchant@sydney.edu.au](mailto:andrew.merchant@sydney.edu.au))

8 Richard A. Richards<sup>2</sup> ([richard.richards@csiro.au](mailto:richard.richards@csiro.au))

9 Richard Trethowan<sup>1</sup> ([richard.trethowan@sydney.edu.au](mailto:richard.trethowan@sydney.edu.au))

10 Thomas N. Buckley<sup>3,\*</sup> ([tnbuckley@ucdavis.edu](mailto:tnbuckley@ucdavis.edu))

11

12 <sup>1</sup> School of Life and Environmental Sciences, Sydney Institute of Agriculture, The University  
13 of Sydney, Brownlow Hill, NSW 2570, Australia

14 <sup>2</sup> CSIRO, Agriculture and Food, GPO Box 1700, Canberra, ACT, 2601, Australia

15 <sup>3</sup> Department of Plant Sciences, University of California, Davis, Davis, CA 95616, USA

16

17 \*Corresponding author: +1 916 917 9217

18

19 Submission date: 5<sup>th</sup> October 2018

20 Number of tables: 0

21 Number of figures: 7 (2 black and white, 5 in colour for print and online)

22 Word count: 5214

23

24 **Highlight**

25 Significant variation exists in the acclimation time of photosynthesis following dark-to-light  
26 transitions across wheat genotypes, under field and controlled conditions. Slow acclimation  
27 reduced daily carbon assimilation by up to 16%.

28

29 **Abstract**

30 Crop photosynthesis and yield are limited by slow photosynthetic induction in sunflecks. We  
31 quantified variation in induction kinetics across diverse genotypes of wheat for the first  
32 time. In a preliminary study using penultimate leaves of 58 genotypes grown in the field, we  
33 measured induction kinetics for maximum assimilation rate ( $A_{\max}$ ) after a shift from full  
34 darkness to saturating light ( $1700 \mu\text{mol m}^{-2} \text{s}^{-1}$ ) with 1-4 replicates per genotype. We then  
35 grew 10 of these genotypes with contrasting responses in a controlled environment and  
36 quantified induction kinetics of carboxylation capacity ( $V_{\text{cmax}}$ ) from dynamic  $A$  vs  $c_i$  curves  
37 after a shift from low to high light (50 to  $1500 \mu\text{mol m}^{-2} \text{s}^{-1}$ ), with 5 replicates per genotype.  
38 Within-genotype median time for 95% induction ( $t_{95}$ ) varied from 8.4 to 23.7 min across  
39 genotypes for  $A_{\max}$  in field-grown penultimate leaves, and from 6.7 to 10.4 min for  $V_{\text{cmax}}$  in  
40 chamber-grown flag leaves. Our simulations suggested that non-instantaneous acclimation  
41 reduces daily net carbon gain by up to 16%, and that breeding to speed up  $V_{\text{cmax}}$  induction in  
42 the slowest genotype to match that in the fastest genotype could increase daily net carbon  
43 gain by more than 4%, particularly for leaves that experience predominantly short-duration  
44 sunflecks.

45

46 **Keywords:** photosynthesis, wheat, rubisco activase, sunfleck, phenotyping, modelling.

47

48

## 49 Introduction

50 Global food security is threatened by growing populations and diminishing increases in crop  
51 yield potential. To ensure future food security, improvements need to be made to plant  
52 yield traits that have previously been overlooked in crop breeding programs, such as  
53 dynamic properties of photosynthesis. The efficiency of photosynthetic machinery under  
54 fluctuating environmental conditions has been identified as a key target for improvement  
55 (Taylor & Long, 2017; Murchie *et al.*, 2018). In particular, the light environment of crop  
56 canopies is highly dynamic, with fluctuations occurring on the scale of seconds to minutes  
57 (Slattery *et al.*, 2018). On clear days, leaves at the top of the canopy are generally exposed  
58 to direct sunlight for the majority of the day, whilst leaves in the lower canopy rely on light  
59 in the form of sunflecks. These sunflecks can account for up to 90% of the daily available  
60 light (Pearcy, 1990).

61  
62 The impact of rapid shifts in photosynthetic photon flux density (PPFD) on carbon balance is  
63 influenced by a number of physiological factors. Diffusion of CO<sub>2</sub> through stomata and the  
64 mesophyll (controlled by conductances  $g_s$  and  $g_m$  respectively) can limit induction of  
65 photosynthesis (Lawson & Vialet-Chabrand, 2018), and conversely, slow deactivation of  
66 energy-consuming photoprotective mechanisms when leaves enter shade flecks can reduce  
67 net carbon gain (Kromdijk *et al.*, 2016). Slow acclimation of photosynthesis following shade  
68 to sun transitions can also substantially reduce carbon assimilation in crop canopies.  
69 Activation of ribulose-1,5-bisphosphate carboxylase/oxygenase (Rubisco) is considered to  
70 be a critical constraint on photosynthetic induction to shade-sun transitions (Soleh *et al.*,  
71 2016; Taylor & Long, 2017; Morales *et al.*, 2018). In a recent study, Taylor & Long (2017)  
72 predicted that carbon assimilation could be inhibited by up to 21% in wheat (*Triticum*  
73 *aestivum*) by slow induction of Rubisco in response to fluctuating light conditions. If this  
74 inefficiency could be reduced, whole canopy carbon assimilation would be improved,  
75 potentially leading to increases in yield (Long *et al.* 2006).

76  
77 Screening for genetic variation in photosynthetic activation time would increase our  
78 fundamental understanding of this process and patterns in variation and dynamics of the  
79 response would allow us to identify whether this trait is a valid target for improvement  
80 through conventional breeding. However, although some variation in the kinetics of

81 photosynthetic acclimation has been identified across soybean genotypes (Soleh *et al.*,  
82 2016; Soleh *et al.* 2017), there is little information available regarding the diversity of this  
83 trait in wheat. Taylor and Long (2017) examined only a single genotype, partly due to the  
84 arduous nature of the "dynamic  $A$  vs  $c_i$ " method they used to characterize the kinetics of  
85 Rubisco activation *in vivo*. Other less direct methods such as *in vitro* Rubisco assays, or high-  
86 throughput phenotyping (HTP) field techniques such as multispectral imaging, could be  
87 applied more readily to the task of phenotyping many genotypes. However, *in vitro* assays  
88 do not capture the interaction of diffusional and biochemical induction. Stomatal and  
89 mesophyll diffusion influence  $[CO_2]$  in chloroplasts, which in turn regulates Rubisco activase  
90 (Portis *et al.*, 1986) – and HTP methods cannot yet quantify photosynthetic rate *per se*, nor  
91 its induction kinetics. Direct measurement of gas exchange in intact leaves thus remains, in  
92 our view, the only suitable method for phenotyping these traits.

93

94 We used a three-phase approach to quantify the extent of genetic variation in  
95 photosynthetic acclimation kinetics in wheat and the potential for directed breeding to  
96 enhance productivity by harnessing this variation. First, we measured the kinetics of  
97 acclimation for  $CO_2$ -saturated photosynthesis after a shift from darkness to saturating light  
98 in penultimate leaves of 58 genotypes of field-grown wheat. Second, we then studied  
99 acclimation kinetics more intensively for a subset of 10 of these genotypes, using the  
100 dynamic  $A$  vs  $c_i$  method to quantify induction of RuBP carboxylation and regeneration  
101 capacities over time after a switch from low to high light. Finally, we used modeling to  
102 quantify the improvement in diurnal net carbon gain that could be achieved by breeding for  
103 faster photosynthetic induction within the observed range of variation across genotypes.

104

105

## 106 **Methods**

### 107 *Plant material*

108 Detailed analysis of photosynthetic acclimation was conducted on wheat grown under  
109 controlled conditions in June/July 2018. 10 genotypes were selected from those grown in  
110 the field the previous year (Table S1). Seed was sown in 5 l pots with compost mix  
111 containing a slow release fertiliser (Evergreen Garden Care Australia, Bella Vista, NSW,  
112 Australia). Day and night temperatures were maintained at  $23.7 \pm 1.7^\circ\text{C}$  and  $12.0 \pm 1.8^\circ\text{C}$   
113 (mean  $\pm$  s.d.) respectively, and relative humidity at  $67.2 \pm 6.1\%$  and  $74.0 \pm 8.1\%$ . Growth  $\text{CO}_2$   
114 concentration was  $482.2 \pm 23.2 \mu\text{mol mol}^{-1}$  across the course of the experiment. Light was  
115 supplied by LED growth lamps (LX602C; Heliospectra AB, Göteborg, Sweden) and provided a  
116 PPFD of  $800 \mu\text{mol m}^{-2} \text{s}^{-1}$  at the leaf surface. Seedlings were thinned to one per pot after  
117 germination. Plants were watered twice daily to field capacity. All gas exchange  
118 measurements were taken on the mid-section of a fully expanded flag leaf during heading  
119 or anthesis (the distribution of Zadoks phenological growth stages during these  
120 measurements is shown in Figure S1).

121

122 For measurement of photosynthetic acclimation in field-grown plants, wheat was planted in  
123 2 x 6 m plots with 5 sowing rows per plot in Narrabri, NSW, Australia in late May 2017. 58  
124 genotypes were examined here (Table S1). Measurements were made on 03-18 Sep 2017,  
125 within two weeks before or after anthesis (the distribution of Zadoks phenological stages  
126 across the field measurement campaign is shown in Figure S1).

127

### 128 *Detailed analysis of acclimation to light in flag leaves of wheat grown in a controlled* 129 *environment*

130 Plants were moved from the controlled environment room to a temperature stable  
131 laboratory at  $25^\circ\text{C}$ . Photosynthetic light response curves were recorded using a LI-6400 gas  
132 exchange system (Li-Cor, Lincoln, NE, USA) on one plant of each genotype. Leaves were  
133 equilibrated to chamber conditions (leaf temperature  $25^\circ\text{C}$ ; leaf vapour pressure deficit 1.0-  
134 1.5 kPa; cuvette  $\text{CO}_2$  ( $c_a$ )  $400 \mu\text{mol mol}^{-1}$ ; and PPFD  $1500 \mu\text{mol m}^{-2} \text{s}^{-1}$  provided by LEDs in  
135 the chamber head) for at least 40 min to allow them to reach steady state. PPFD was then  
136 reduced through 1200, 1000, 800, 600, 500, 400, 300, 200, 150, 100, 50 and  $0 \mu\text{mol m}^{-2} \text{s}^{-1}$ ,  
137 with measurements taken immediately after chamber conditions had stabilized at each

138 level. Light responses curves were fitted to a non-rectangular hyperbola model using  
139 nonlinear least squares in R (*nls*; R Language and Environment); i.e., the lesser root  $A$  of  
140

$$141 \quad (1) \quad \theta(A - R_d)^2 - (\phi i + A_{sat})(A - R_d) + \phi i A_{sat} = 0$$

142  
143 where  $i$  is PPFD,  $A_{sat}$  is the asymptotic limit of  $A$  at high PPFD,  $\theta$  is a dimensionless parameter  
144  $< 1$ ,  $\phi$  is the initial slope of  $A_{eq}$  vs  $i$ , and  $R_d$  is day respiration rate.  $A_{sat}$ ,  $\theta$ ,  $\phi$  and  $R_d$  were fitted  
145 empirically.

146  
147 Dynamic  $A$  vs  $c_i$  responses were recorded using four Walz GFS-3000 gas exchange systems  
148 (Heinz Walz GmbH, Effeltrich, Germany), using the method of Taylor & Long (2017). The  
149 acclimation of photosynthesis following transition from shade to saturating light was  
150 measured at a number of different  $c_a$  values, and composite  $A$  vs  $c_i$  curves were generated  
151 for each relative time point during induction. Leaf temperature was held at 25°C and  $VPD_{leaf}$   
152 at 1.0 kPa. Each leaf was first brought to a steady state at  $c_a$  400  $\mu\text{mol mol}^{-1}$  and PPFD 1500  
153  $\mu\text{mol m}^{-2} \text{s}^{-1}$  (found to be saturating in our light response curves) over 40 min, and PPFD in  
154 the leaf chamber was then dropped to 50  $\mu\text{mol m}^{-2} \text{s}^{-1}$  for 30 min. During this ‘dark phase’  
155 the  $c_a$  was also reduced to 100  $\mu\text{mol mol}^{-1}$  to inhibit stomatal closure, as per guidelines in  
156 Taylor & Long (2017). Prior to induction the  $c_a$  was increased to the desired value for  
157 induction. Induction of photosynthesis was initiated with a step change to PPFD 1500  $\mu\text{mol}$   
158  $\text{m}^{-2} \text{s}^{-1}$ , and measurements recorded every 10 seconds for 15 min. This 30 min dark – 15 min  
159 light cycle was repeated at induction  $c_a$  of 50, 100, 200, 300, 400, 500, 600, 800 and 1000  
160  $\mu\text{mol mol}^{-1}$ .

161  
162  $A$  vs  $c_i$  curves were generated for each 10 s time point after induction of photosynthesis. The  
163 Farquhar et al. (1980) photosynthesis model was fitted to these curves using the  
164 ‘plantecophys’ package in R (bilinear fitting method; Duursma, 2015) to provide estimates of  
165 Rubisco carboxylation capacity ( $V_{cmax}$ ) and electron transport rate ( $J$ ).  $R_d$  was set at 1.9  $\mu\text{mol}$   
166  $\text{m}^{-2} \text{s}^{-1}$  and  $\theta$  was set at 0.67 (from our light response curves). We also provided the  
167 Michaelis-Menten coefficient and the photorespiratory compensation point, calculated  
168 from the mean leaf temperature as per Bernacchi et al. (2001). Temperature corrections

169 were performed during the fitting process to provide values of  $V_{\text{cmax}}$  and  $J$  at 25°C. The script  
170 used for curve fitting is provided in Supporting Information File S2.

171

172 For each leaf, we modeled the observed timecourse of induction of  $V_{\text{cmax}}$  using a two-phase  
173 exponential function of time:

174

175 (2) 
$$V_{\text{cmax}}(t) = V_{mi} + (V_{mf} - V_{mi}) \left\{ f \left( 1 - \exp\left(-\frac{t}{\tau_{fast}}\right) \right) + (1 - f) \left( 1 - \exp\left(-\frac{t}{\tau_{slow}}\right) \right) \right\}$$

176

177 where the parameters ( $V_{mi}$  and  $V_{mf}$  are the initial and final (fully acclimated) values of  $V_{\text{cmax}}$ ,  
178  $\tau_{fast}$  and  $\tau_{slow}$  are time constants for fast and slow phases of acclimation, respectively, and  $f$  is  
179 a weighting factor between zero and one) were estimated by using Solver in MS Excel to  
180 minimize the sum of squared differences between measured and modeled  $V_{\text{cmax}}$ . We found  
181 that this two-phase model produced a substantially better fit to our data than a single-  
182 phase model as used by Taylor and Long (2017), with  $r^2$  ranging from 0.957 to 0.996 (median  
183 = 0.990).

184

#### 185 *Photosynthetic acclimation to light in penultimate leaves of field grown wheat*

186 We used OCTOflux to measure photosynthetic acclimation upon transition from darkness to  
187 saturating light in penultimate leaves of 58 genotypes of field grown wheat. This system is  
188 described elsewhere (Salter et al., 2018). It is an open-flow single-pass differential gas  
189 exchange system with eight leaf chambers (5 × 11 cm), designed to maximize throughput  
190 for measurements of CO<sub>2</sub>- and light-saturated net photosynthesis rate ( $A_{\text{max}}$ ). Each chamber  
191 has a white LED light source above the adaxial leaf surface, a Propafilm window, four small  
192 mixing fans and a type T thermocouple kept appressed to the abaxial surface. Stable dry air  
193 is created by mixing CO<sub>2</sub> and dry air from pressurized cylinders with mass flow controllers  
194 into a buffering volume (~40 L) containing a powerful fan. This gas is then split into nine  
195 streams: a reference stream, which flows through the reference cell of a differential infrared  
196 gas analyzer (IRGA; Li-7000, Li-Cor, Lincoln, Nebraska), and eight sample streams, each of  
197 which runs through a mass flow meter to a leaf chamber and back to the IRGA, where it is

198 either vented to the atmosphere or directed through the IRGA sample cell, using solenoid  
199 valves.

200

201 Tillers were cut in the field, immediately recut under distilled water and placed into  
202 darkness and transported by vehicle to the laboratory (about 1 km away; time from cutting  
203 to laboratory was 5-15 min), and kept in darkness for a further 0 – 30 minutes before  
204 measurement. Each leaf was enclosed in a leaf chamber and exposed to saturating PPFD  
205 ( $1700 \mu\text{mol m}^{-2} \text{s}^{-1}$ ) and ambient  $\text{CO}_2$  ( $4800 - 5000 \mu\text{mol mol}^{-1}$ ), and then allowed to  
206 acclimate to these conditions. To verify that  $A_{\text{max}}$  measured at these high  $c_a$  values did not  
207 differ substantially from the true  $A_{\text{max}}$ , which occurs at the transition point between RuBP-  
208 regeneration-limited and triose phosphate utilization (TPU) limited photosynthesis, we  
209 measured traditional  $A$  vs  $c_i$  curves in 18 leaves and extrapolated these to high  $c_a$  using a  
210 biochemical model (Farquhar et al. 1980) as extended by Busch et al. (2018), and found that  
211  $A_{\text{max}}$  at  $5000 \mu\text{mol mol}^{-1}$  was an excellent proxy for true  $A_{\text{max}}$  ( $r^2 = 0.9841$ , slope = 0.9968;  
212 Figure S2). Full details of these tests are given in Salter et al. (2018).

213

214 The present study took advantage of the fact that the sample gas stream from one of the  
215 eight chambers could be continuously measured during photosynthetic acclimation to  
216 saturating light. We recorded net  $\text{CO}_2$  assimilation rate every two seconds until stability was  
217 achieved (average ~14 min), and the record of  $A$  vs time was then modeled with the  
218 following sigmoidal equation:

219

$$220 \quad (3) \quad A(t) = A_{\text{init}} + (A_{\text{max}} - A_{\text{init}}) \exp(-a \cdot \exp(-bt))$$

221

222 where  $A_{\text{init}}$ ,  $A_{\text{max}}$ ,  $a$  and  $b$  are positive empirical parameters fitted by using Solver (GRG  
223 nonlinear engine) in Microsoft Excel to minimize the sum of squared differences between  
224 measured and modeled  $A$ . The times for  $A$  to rise by 25%, 75% and 95% of the difference  
225 between  $A_{\text{init}}$  and  $A_{\text{max}}$  ( $t_{25}$ ,  $t_{75}$  and  $t_{95}$ , respectively) were then calculated from the fitted  
226 parameters, as  $t_x = \ln(a / \ln(1 / [0.01 \cdot x])) / b$ , where  $x = 25, 75$  or  $95$ . The "rise time," or the time  
227 required for  $A$  to increase through the middle 50% of its dynamic range, was calculated as  
228  $t_{75} - t_{25}$ .



229

230 Because the workflow was organized around the broader phenotyping study (in which 160  
231 genotypes were measured), replication was unbalanced among the 58 genotypes for which  
232 we recorded acclimation kinetics, with  $n = 1$  to 4 replicate plants per genotype.

233

#### 234 *Modeling impact of acclimation kinetics on carbon gain*

235 We simulated the impact of observed variability in photosynthetic acclimation kinetics on  
236 diurnal carbon gain for different sunfleck lengths and canopy positions, using a modeling  
237 approach similar to that of Taylor and Long (2017), and simulating  $V_{\text{cmax}}$  induction kinetics  
238 using median kinetic parameters for the slowest and fastest of the 10 genotypes studied. To  
239 assess the role of sunfleck length and canopy position, we calculated irradiance based on  
240 expressions given by Retkute et al. (2018) and de Pury and Farquhar (de Pury & Farquhar,  
241 1997), rather than the sample ray tracing model output used by Taylor and Long (2017). The  
242 modeling approach is described in detail in Appendix S1; sample diurnal traces of leaf  
243 irradiance, including alternating sunflecks and shade flecks, are shown in Figure 1.

244

#### 245 *Analysis of $A$ vs $c_i$ data with the 'one-point method'*

246 We tested whether the 'one-point method' of De Kauwe et al. (2016) would provide robust  
247 estimates of  $V_{\text{cmax}}$  during photosynthetic acclimation to dark-to-light transitions. For this  
248 analysis we used the dark-to-light photosynthetic induction at  $c_a$  400  $\mu\text{mol mol}^{-1}$  from our  
249 dynamic  $A$  vs  $c_i$  analysis, and estimated  $V_{\text{cmax}}$  by fitting the Farquhar et al. (1980) model to  
250 the data using the 'plantecophys' package in R (Duursma, 2015).

251

#### 252 *Statistical analysis*

253 We tested for differences among genotypes in functional parameters of acclimation kinetics  
254 ( $t_{95}$  and  $t_{75-t_{25}}$ ) using analysis of variance (function `aov()` in base R) with genotype as a  
255 categorical independent variable and  $t_{95}$ , etc., as dependent variables (after transformation  
256 to improve normality, by inversion [i.e.,  $y = 1/t_{95}$ ] for chamber-grown plants, and by log  
257 transformation for field-grown plants). Outliers for  $t_{95}$  and  $t_{75-t_{25}}$  were removed from the  
258  $V_{\text{cmax}}$  dataset on the basis of a Grubbs test (R package 'outliers') applied to each genotype;  
259 this resulted in removal of three values for  $t_{95}$  and four for  $t_{75-t_{25}}$ .

260

261

## 262 **Results**

### 263 *Measurement and modeling of acclimation kinetics*

264  $A$  vs  $c_i$  curves fit to each 10 s interval following transition from shade ( $50 \mu\text{mol m}^{-2} \text{s}^{-1}$ ) to  
265 saturating light ( $1500 \mu\text{mol m}^{-2} \text{s}^{-1}$ ) revealed limitations imposed by  $V_{\text{cmax}}$  at lower  $c_i$  and by  $J$   
266 at higher  $c_i$  throughout induction. Whilst specific acclimation times varied between  
267 individual leaves and among genotypes (fitted dynamic  $A$  vs  $c_i$  curves for a slow and a fast  
268 acclimating leaf are shown in Fig 2a and 2b respectively), general trends in induction kinetics  
269 were clear (Fig S3). Both  $V_{\text{cmax}}$  and  $J$  increased immediately after transition to saturating  
270 light, however  $J$  increased more rapidly than  $V_{\text{cmax}}$  in the first three minutes and also  
271 saturated more quickly. As a result,  $c_{i,\text{trans}}$  (the  $c_i$  at which the primary limitation imposed on  
272 photosynthesis switches between  $V_{\text{cmax}}$  and  $J$ ) rose to a maximum of  $563 \pm 3.2 \mu\text{mol mol}^{-1}$   
273 three minutes after transition to saturating light, decreasing to  $422 \pm 4.1 \mu\text{mol mol}^{-1}$  after  
274 seven minutes and remaining relatively stable after this time (Fig S3c). The high values of  
275  $c_{i,\text{trans}}$  throughout induction indicate that  $V_{\text{cmax}}$  is likely always limiting to photosynthesis  
276 under field conditions (assuming  $c_a$  of approx.  $400 \mu\text{mol mol}^{-1}$ ). A two-phase exponential  
277 model was fitted to the measured  $V_{\text{cmax}}$  data with  $r^2$  ranging from 0.957 to 0.996 (median =  
278 0.990), a representative timecourse of  $V_{\text{cmax}}$  induction is shown in Figure 3b.

279

280 Photosynthetic induction kinetics of plants grown under field conditions differed from those  
281 grown under controlled conditions, specifically there was an initial lag phase after transition  
282 to saturating light. A representative timecourse of  $A_{\text{max}}$  induction of field grown plants is  
283 shown in Figure 3a. A sigmoidal equation was fitted to the acclimation kinetics of  $A_{\text{max}}$  of  
284 field grown plants with median  $r^2 > 0.99$ .

285

### 286 *Variation in photosynthetic induction kinetics*

287 For  $A_{\text{max}}$  in penultimate leaves of field-grown wheat, within-genotype median  $t_{95}$  (the time  
288 for  $A_{\text{max}}$  to rise through 95% of its dynamic range) ranged from 8.4 to 23.7 min across  
289 genotypes (Fig 4a). The within-genotype median for  $t_{75} - t_{25}$  (the time required for  $A_{\text{max}}$  to  
290 increase through the middle 50% of its dynamic range) varied from 1.5 to 7.6 min (Fig 4b).  
291 Differences among genotypes were not significant for either variable ( $F(57,73) = 0.8$ ,  $p =$

292 0.81 for  $t_{95}$ , and  $F(57,73) = 0.94$ ,  $p = 0.6$  for  $t_{75} - t_{25}$ ). Across genotypes the final  $A_{\max}$  was  
293 unrelated to  $t_{95}$  ( $r^2 = 0.027$ ,  $p = 0.058$ ) or  $t_{75} - t_{25}$  ( $r^2 < 0.001$ ,  $p = 0.923$ ) (Fig S4a and S4c).

294

295 The rate of induction also varied greatly across genotypes for  $V_{\text{cmax}}$  in flag leaves of chamber-  
296 grown wheat. Within-genotype medians ranged from 6.7 to 10.4 for  $t_{95}$ , and from 2.2 to 3.1  
297 for  $t_{75} - t_{25}$  (Fig 4c,d). Differences among genotypes were highly significant for  $t_{95}$  ( $F(9,37) =$   
298  $3.97$ ,  $p = 0.0013$ ), but not significant for  $t_{75} - t_{25}$  ( $F(9,37) = 1.99$ ,  $p = 0.07$ ). The corresponding  
299 within-genotype median time constants for the fast and slow phases of acclimation,  $\tau_{\text{fast}}$  and  
300  $\tau_{\text{slow}}$ , respectively, ranged from 0.05 min to 0.51 min ( $\tau_{\text{fast}}$ ) and from 2.6 to 4.5 min ( $\tau_{\text{slow}}$ );  
301 the weighting factor for the fast phase ( $f$ ) was 0.39 in the fastest genotype and 0.49 in the  
302 slowest. Figure 5 shows representative time-courses of acclimation of normalized  $V_{\text{cmax}}$   
303 corresponding to these lower and upper deciles for  $\tau_{\text{fast}}$  and  $\tau_{\text{slow}}$ . The final  $V_{\text{cmax}}$  was  
304 unrelated to  $t_{95}$  ( $r^2 = 0.072$ ,  $p = 0.060$ ) but was loosely correlated with  $t_{75} - t_{25}$  ( $r^2 = 0.146$ ,  $p =$   
305  $0.006$ ) (Fig S4b and S4d).

306

### 307 *Simulated effect of variation in acclimation kinetics on diurnal carbon gain*

308 Our simulations predicted that non-instantaneous acclimation of photosynthesis to  
309 sunflecks could reduce daily carbon gain by as much as 16% (Figure 6a). The reduction was  
310 generally greatest for shorter-duration sunflecks, because photosynthesis has less  
311 opportunity to approach its fully acclimated "target" value during short sunflecks. This  
312 reduction was greater for the slowest genotype than for the fastest under most conditions,  
313 with the exception of short-duration sunflecks in upper-canopy leaves ( $\text{LAI} = 0.25 \text{ m}^2 \text{ m}^{-2}$ )  
314 (Figure 6a). Leaf orientation had fairly small effects on simulated carbon losses due to slow  
315 induction (Figure S5), so results presented in the main text were integrated over a spherical  
316 leaf angle distribution.

317

318 To consider the gains that could realistically be achieved by breeding, given the variability  
319 we observed, we also computed the % loss of daily carbon gain using the "fast" acclimating  
320 genotypes as the baseline for comparison with "slow" genotypes, rather than using  
321 instantaneous acclimation as the baseline (Fig 6b). The relative advantage of faster  
322 acclimation was greatest for sunflecks of short to intermediate duration; for example, for 8-

323 min sunflecks, "slow" genotypes gained 2.9 to 4.3% less carbon over a day than "fast"  
324 genotypes.

325

## 326 **Discussion**

327 We found greater than two-fold variation across genotypes of wheat in the time required  
328 for 95% photosynthetic induction ( $t_{95}$ ) after exposure to saturating light, both for maximum  
329 photosynthesis rate in penultimate leaves and more specifically for carboxylation capacity in  
330 flag leaves. Our simulations suggest that diurnal carbon gain is depressed by up to 15% by  
331 non-instantaneous induction of photosynthesis in sunflecks, and is up to 4% lower in the  
332 "slowest" genotypes that we studied as compared to the "fastest". This complements recent  
333 work (Taylor & Long, 2017) documenting the potential impacts on carbon gain of slow  
334 Rubisco induction in sunflecks by demonstrating variation in this important trait in available  
335 genetic resources, showing that realistic gains are achievable even using traditional  
336 breeding.

337

### 338 *Variation in induction kinetics*

339 Our preliminary analysis of 58 wheat genotypes suggested wide variation in acclimation  
340 kinetics, with genotype median  $t_{95}$  varying 2.82-fold overall (2.66-fold among the 37  
341 genotypes for which we had at least two measurements), and our laboratory study with  
342 balanced replication ( $n=5$ ) within ten genotypes found 1.6-fold variation in genotype  
343 median  $t_{95}$  for  $V_{cmax}$  induction. Up till now there has been little information about diversity of  
344 photosynthetic induction kinetics across wheat genotypes, however Soleh *et al.* (2017)  
345 found wide variation across 37 soybean cultivars and noted that this variation was  
346 genetically determined (i.e. stable across different leaf positions and phenological stages).  
347 As in our study in wheat, differences among soybean genotypes were attributed largely to  
348 variation in the rate of Rubisco activation. Additionally, induction kinetics were not  
349 correlated with steady-state photosynthetic capacity, and there was little evidence for this  
350 in our study (Fig S4). This observation, if held true over a broader range of studies has large  
351 ramifications for breeding approaches based upon the magnitude of  $A_{max}$ , in particular those  
352 focused solely on the flag leaf. Based on evidence presented here, efforts to improve net  
353 carbon capture across canopies must also consider the responses of  $A$  to short term changes

354 in the environment as a dynamic acclimation property that is at least partially genetically  
355 determined (Murchie et al. 2018).

356

357 Acclimation of  $A_{\max}$  in field-grown penultimate leaves differed markedly from acclimation of  
358  $V_{\max}$  in chamber-grown flag leaves. The former was sigmoidal with time, having a lag phase  
359 and longer  $t_{95}$  (median 12.62 min), whereas the latter was double-exponential with time,  
360 with no lag and shorter  $t_{95}$  (median 8.25 min). These differences are not necessarily  
361 surprising, given the numerous differences between the two experiments; we initially  
362 discovered wide variation in  $t_{95}$  for  $A_{\max}$  in the field experiment, and then designed the  $V_{\max}$   
363 experiment to be comparable to that of Taylor and Long (2017) rather than the  $A_{\max}$   
364 experiment. We note, however, that the 'rise time' ( $t_{75} - t_{25}$ , the time required for  $A_{\max}$  or  
365  $V_{\max}$  to rise through the middle 50% of its dynamic range) was more similar between the  
366 two experiments (median 3.26 min for  $A_{\max}$  vs 2.60 min for  $V_{\max}$ ) than was  $t_{95}$ , which may  
367 suggest that different processes give rise to the lag and rise phases. Future work should test  
368 for effects of leaf rank and growth environment under otherwise identical conditions, and  
369 should aim to determine whether the lag phase observed in  $A_{\max}$  induction occurs when  
370 leaves are pre-acclimated in low PPFD rather than darkness, as is more realistic for leaves in  
371 a natural canopy.

372

373 Photosynthetic induction has long been known to involve at least two phases. The initial,  
374 fast phase to involve availability of RuBP or other Calvin cycle intermediates and is complete  
375 within 1-2 minutes (Pearcy 1990), which is consistent with the median  $t_{95}$  that we found for  
376 the fast phase of  $V_{\max}$  induction (within-genotype median  $\tau_{\text{fast}} = 19.1$  sec, which gives  $t_{95} =$   
377 57 sec). The slower phase apparently involves light-dependent activation of Rubisco by  
378 Rubisco activase (Rca), with time constants of 4-5 min reported for *Alocasia* and *Spinacia*  
379 *oleracea* (Pearcy 1990) (cf. 2.6 – 5.6 min for  $\tau_{\text{slow}}$  in this study). In low light, sugar phosphates  
380 bind to Rubisco active sites, inhibiting carboxylation of RuBP. To restore normal function,  
381 Rubisco activase (Rca) uses energy from ATP hydrolysis to actively remove these inhibitors.  
382 Rca is sensitive to the chloroplast ADP/ATP ratio and redox status and so mediates Rubisco  
383 activation in response to light (Carmo-Silva et al. 2015). The variation in Rubisco activation  
384 kinetics found among wheat genotypes in our study could possibly be attributed to  
385 differences in (1) the total concentration of Rca, (2) the relative concentrations of the  $\alpha$ - and

386  $\beta$ -Rca isoforms to each other, (3) the binding affinities of Rubisco to inhibitors and of Rca to  
387 Rubisco, and (4) the localization of Rca relative to Rubisco. In rice, Rca overexpressing  
388 mutants maintain higher Rubisco activation states in the dark and respond more quickly to  
389 changes in the light environment than wild type plants (Yamori et al. 2012). *Arabidopsis*  
390 mutants expressing only the  $\beta$ -Rca isoform – less sensitive to chloroplast redox status and  
391 ADP/ATP ratio than  $\alpha$ -Rca – had faster photosynthetic induction rates and exhibited  
392 increased growth under fluctuating light compared to plants with both isoforms (Carmo-  
393 Silva & Salvucci 2013). As for the binding affinities and co-localization of these two enzymes,  
394 much less is known (for a review of current knowledge please see Mueller-Cajar et al. 2014)  
395 and future work should seek to address these gaps in knowledge. The recent  
396 characterization of the wheat Rca gene structure, as well as advances in genomic, proteomic  
397 and transcriptomic techniques, should provide a better understanding of these limitations  
398 and allow for a more targeted breeding approach to improve photosynthesis under dynamic  
399 light conditions (Carmo-Silva et al. 2015).

400

401 We did not measure deacclimation kinetics, but for modeling we assumed deacclimation  
402 kinetics in shadeflecks to be slower than acclimation in sunflecks by a factor of 5/3 (1.67),  
403 following Taylor and Long (2017). However, other evidence suggests deacclimation kinetics  
404 may be much slower still (e.g., 22-30 min in *Alocasia* and *Spinacia*; Pearcy 1990), which may  
405 mitigate the inferred benefits of breeding for faster acclimation, as discussed below.

406

#### 407 *Impact of slow induction on photosynthesis*

408 Consistent with the recent report by Taylor and Long (2017), our modeling found that non-  
409 instantaneous acclimation of photosynthesis to fluctuating light can reduce daily carbon  
410 gain by up to 15%. The present study extends that conclusion by quantifying the potential  
411 impact of varying sunfleck duration, canopy position (which influences the relative  
412 proportions of time spent by leaves in sunflecks vs. shadeflecks) and leaf orientation.  
413 Specifically, we found that the impact of slow acclimation was greatest for short sunflecks,  
414 because when sunflecks are similar to or much longer than the  $t_{95}$  for acclimation, leaves  
415 will be fully acclimated for most of each sunfleck, and thus losing little potential carbon gain.  
416 Leaf orientation had very small effects (Fig S5). The effect of canopy position was also fairly

417 small in most cases (Fig 6), though projected % carbon losses due to slow acclimation were  
418 generally greatest at intermediate canopy depths (cumulative LAI = 0.75 m<sup>2</sup> m<sup>-2</sup>).

419

420 An important exception was for leaves of slow-acclimating genotypes in upper canopy layers  
421 (LAI = 0.25 m<sup>2</sup> m<sup>-2</sup>), which our simulations suggested would experience only half as much  
422 daily carbon loss as lower-canopy leaves (LAI = 1.5 m<sup>2</sup> m<sup>-2</sup>) (7.6 vs 15.9%) for very short  
423 sunflecks (< 1 min). In fact, for upper-canopy leaves with very short sunflecks, slow-  
424 acclimating genotypes actually had a slight advantage over fast genotypes in our simulations  
425 (dashed black line in Fig 6b). This is a consequence of the wider range that we observed  
426 (and which we used to drive the simulations) for  $\tau_{\text{fast}}$  (upper and lower deciles = 0.54 and  
427 0.05 min, respectively) vs  $\tau_{\text{slow}}$  (5.6 vs 2.6 min). This meant that the faster and thus greater  
428 downregulation in "fast" genotypes during short shade flecks left them at a lower initial  
429 photosynthetic rate at the start of the subsequent sunfleck than "slow" genotypes, which  
430 outweighed the benefits of their faster upregulation during sunflecks (Fig 7a). For longer  
431 shade flecks, the reverse was true (Fig 7b). However, we emphasize that this result depends  
432 heavily on the assumed kinetics of photosynthetic deacclimation during shade flecks; as  
433 noted earlier, we assumed, following Taylor and Long (2017), that the time constants for  
434 deacclimation were 1.67 times greater than for acclimation. Had we instead assumed  
435 deacclimation to be 4-6 times slower than acclimation, as suggested by some data (Seeman  
436 et al 1988; Woodrow & Mott 1989; Way & Pearcy 2012), it is unlikely that 'slow' acclimating  
437 genotypes would have a carbon gain advantage except perhaps in extremely brief sunflecks.  
438 This highlights the need for future work to quantify the kinetics of deacclimation.

439

440 In very short sunflecks, other factors may dominate dynamics of photosynthesis. For  
441 example, buffering of high-frequency (10 – 0.1 Hz) fluctuations in light availability by the  
442 'capacitance' afforded by finite metabolite pools can increase the effective light use  
443 efficiency of very high sunfleck PPFs above 100%, as compared to the average  
444 photosynthesis rate when the same PPF is sustained (Pearcy 1990). Rubisco acclimation  
445 and deacclimation are probably not relevant to such short sunflecks, which may dominate  
446 canopy light regimes under windy conditions, or for plants with very small leaves.

447

448 By driving our simulations with observed variation in acclimation kinetics within existing  
449 genetic resources for wheat, we were also able to quantify the realistic gains in diurnal  
450 carbon capture that should be possible with traditional breeding. We found that the slowest  
451 genotypes (modeled using the the highest decile for  $\tau_{\text{slow}}$ ) gained up to 4% less carbon, daily,  
452 than the fastest (modeled using the lowest decile for  $\tau_{\text{slow}}$ ), and that the potential gains  
453 were greatest for leaves at intermediate canopy positions (LAI = 0.75 and 1.5 m<sup>2</sup> m<sup>-2</sup>) and  
454 for sunflecks of short to intermediate duration (2-16 min) (Fig 6b). Although these potential  
455 gains are not as dramatic as the "headline" numbers of 15-20% based on instantaneous  
456 acclimation as the target, they are nevertheless worth pursuing and are sufficiently  
457 conservative within genotypes to be a feasible target for breeders. We suggest that  
458 continuing work should therefore aim to further quantify variation in this important trait  
459 across genotypes of wheat, and to identify target genomic regions to assist breeding efforts.  
460 In this capacity, we note that our test of the "single-point"  $A$  vs  $c_i$  method produced very  
461 reliable inference of  $V_{\text{cmax}}$  during induction (Fig S6), suggesting that induction kinetics can be  
462 reliably quantified with as little as one-tenth the time investment per leaf as required for  
463 the full dynamic  $A$  vs  $c_i$  method used in this study.

464

## 465 **Conclusions**

466 Our study has for the first time identified significant variation in the acclimation time of  
467 photosynthesis following dark-to-light transitions across a diverse panel of wheat  
468 genotypes, under field and controlled conditions. Slow acclimation of photosynthesis  
469 reduced daily carbon assimilation by as much as 16%. These results reinforce the findings of  
470 Taylor & Long (2017) in highlighting fast acclimation of photosynthesis, in particular the  
471 activation of Rubisco, to fluctuating light as a valuable trait for improvement in wheat  
472 breeding programs.

473

474



475 **Supporting Information**

476 *File S1:*

- 477 - Appendix S1. Modeling impact of acclimation kinetics on carbon gain.
- 478 - Table S1. List of genotypes.
- 479 - Figure S1. Phenological stages at time of measurements.
- 480 - Figure S2. Validation of  $A_{\max}$  in TPU-limited conditions.
- 481 - Figure S3. Intercellular  $[CO_2]$  at RuBP carboxylation/regeneration transition during
- 482 induction.
- 483 - Figure S4. Relationship between final  $A_{\max}$  and  $V_{\max}$  rates and  $t_{95}$  and  $t_{75} - t_{25}$ .
- 484 - Figure S5. Effect of leaf orientation on diurnal carbon losses due to slow induction.
- 485 - Figure S6. Comparison of default and “one-point”  $A$  vs.  $c_i$  fitting methods.

486

487 *File S2:*

- 488 - R script for dynamic  $A$  vs  $c_i$  curve fitting
- 489 - R script for analysis of acclimation kinetics

490

491 *File S3:*

- 492 - CSV file containing extracted kinetics parameters.

493

494 **Acknowledgements**

495 This research was supported by the International Wheat Yield Partnership, through a grant  
496 provided by the Grains Research and Development Corporation (US00082). TNB was  
497 supported by the Australian Research Council (DP150103863 and LP130100183) and the  
498 National Science Foundation (Award #1557906). This work was supported by the USDA  
499 National Institute of Food and Agriculture, Hatch project 1016439.

500

## References

- Bernacchi CJ, Singaas EL, Pimentel C, Portis ARJ, Long SP.** 2001. Improved temperature response functions for models of Rubisco-limited photosynthesis. *Plant, Cell and Environment* **24**, 253-259.
- Busch FA, Sage RF, Farquhar GD.** 2018. Plants increase CO<sub>2</sub> uptake by assimilating nitrogen via the photorespiratory pathway. *Nature Plants* **4**, 46-54.
- Carmo-Silva AE, Salvucci ME.** 2013. The regulatory properties of Rubisco activase differ among species and affect photosynthetic induction during light transitions. *Plant Physiology* **161**, 1645-1655.
- Carmo-Silva E, Scales JC, Madgwick PJ, Parry MAJ.** 2015. Optimizing Rubisco and its regulation for greater resource use efficiency. *Plant Cell and Environment* **38**, 1817-1832.
- De Kauwe MG, Lin YS, Wright IJ, Medlyn BE, Crous KY, Ellsworth DS, Maire V, Prentice IC, Atkin OK, Rogers A, Niinemets U, Serbin SP, Meir P, Uddling J, Togashi HF, Tarvainen L, Weerasinghe LK, Evans BJ, Ishida FY, Domingues TF.** 2016. A test of the 'one-point method' for estimating maximum carboxylation capacity from field-measured, light-saturated photosynthesis. *New Phytologist* **210**, 1130-1144.
- de Pury DGG, Farquhar GD.** 1997. Simple scaling of photosynthesis from leaves to canopies without the errors of big-leaf models. *Plant, Cell and Environment* **20**, 537-557.
- Duursma RA.** 2015. Plantecophys - An R package for analysing and modelling leaf gas exchange data. *Plos One* **10**, 13.
- Farquhar GD, Caemmerer SV, Berry JA.** 1980. A biochemical-model of photosynthetic CO<sub>2</sub> assimilation in leaves of C-3 species. *Planta* **149**, 78-90.
- Kromdijk J, Głowacka K, Leonelli L, Gabilly ST, Iwai M, Niyogi KK, Long SP.** 2016. Improving photosynthesis and crop productivity by accelerating recovery from photoprotection. *Science* **354**, 857-861.
- Lawson T, Vialet-Chabrand S.** 2018. Speedy stomata, photosynthesis and plant water use efficiency. *New Phytologist*.
- Long SP, Zhu XG, Naidu SL, Ort DR.** 2006. Can improvement in photosynthesis increase crop yields? *Plant Cell and Environment* **29**, 315-330.
- Morales A, Kaiser E, Yin X, Harbinson J, Molenaar J, Driever SM, Struik PC.** 2018. Dynamic modelling of limitations on improving leaf CO<sub>2</sub> assimilation under fluctuating irradiance. *Plant, cell & environment* **41**, 589-604.

- Mueller-Cajar O, Stotz M, Bracher A.** 2014. Maintaining photosynthetic CO<sub>2</sub> fixation via protein remodelling: the Rubisco activases. *Photosynthesis Research* **119**, 191-201.
- Murchie EH, Kefauver S, Ortega JLA, Muller O, Rascher U, Flood PJ, Lawson T.** 2018. Photosynthesis: a fast-changing process in an even faster world (Invited Review). *Annals of botany* **122**, 207-220.
- Pearcy RW.** 1990. Sunflecks and photosynthesis in plant canopies. *Annual Review of Plant Physiology and Plant Molecular Biology* **41**, 421-453.
- Portis AR, Salvucci ME, Ogren WL.** 1986. Activation of ribulosebisphosphate carboxylase/oxygenase at physiological CO<sub>2</sub> and ribulosebisphosphate concentrations by Rubisco activase. *Plant Physiology* **82**, 967-971.
- Retkute R, Townsend AJ, Murchie EH, Jensen OE, Preston SP.** 2018. Three-dimensional plant architecture and sunlit–shaded patterns: a stochastic model of light dynamics in canopies. *Annals of botany*.
- Salter WT, Gilbert ME, Buckley TN.** 2018. A multiplexed gas exchange system for increased throughput of photosynthetic capacity measurements. *Plant Methods* **14**, 80.
- Seemann JR, Kirschbaum MUF, Sharkey TD, Pearcy RW.** 1988. Regulation of ribulose-1,5-bisphosphate carboxylase activity in *Alocasia-macrorrhiza* in response to step changes in irradiance. *Plant Physiology* **88**, 148-152.
- Slattery RA, Walker BJ, Weber AP, Ort DR.** 2018. The impacts of fluctuating light on crop performance. *Plant Physiology* **176**, 990-1003.
- Soleh MA, Tanaka Y, Kim SY, Huber SC, Sakoda K, Shiraiwa T.** 2017. Identification of large variation in the photosynthetic induction response among 37 soybean *Glycine max* (L.) Merr. genotypes that is not correlated with steady-state photosynthetic capacity. *Photosynthesis Research* **131**, 305-315.
- Soleh MA, Tanaka Y, Nomoto Y, Iwahashi Y, Nakashima K, Fukuda Y, Long SP, Shiraiwa T.** 2016. Factors underlying genotypic differences in the induction of photosynthesis in soybean *Glycine max* (L.) Merr. *Plant Cell and Environment* **39**, 685-693.
- Taylor SH, Long SP.** 2017. Slow induction of photosynthesis on shade to sun transitions in wheat may cost at least 21% of productivity. *Philosophical Transactions of the Royal Society B-Biological Sciences* **372**, 9.
- Way DA, Pearcy RW.** 2012. Sunflecks in trees and forests: from photosynthetic physiology to global change biology. *Tree Physiology* **32**, 1066-1081.

**Woodrow IE, Mott KA.** 1989. Rate limitation of non-steady-state photosynthesis by ribulose-1,5-bisphosphate carboxylase in spinach. *Australian Journal of Plant Physiology* **16**, 487-500.

**Yamori W, Masumoto C, Fukayama H, Makino A.** 2012. Rubisco activase is a key regulator of non-steady-state photosynthesis at any leaf temperature and, to a lesser extent, of steady-state photosynthesis at high temperature. *Plant Journal* **71**, 871-880.

## Figure legends

**Figure 1.** Representative time-courses of simulated PPFD with alternating sunflecks and shade flecks (solid lines, left axis) and the fraction of time spent in sunflecks by leaves (dashed lines, right axis), for two canopy positions: cumulative leaf area indices of (a)  $0.25 \text{ m}^2 \text{ m}^{-2}$ , and (b)  $1.5 \text{ m}^2 \text{ m}^{-2}$ . Simulations assumed a constant sunfleck duration of 16 minutes.

**Figure 2.** Two examples of dynamic  $A$  vs  $c_i$  curves, for a leaf with relatively slow acclimation of photosynthesis to light (a; time for  $V_{\text{cmax}}$  to increase by 95% of the difference from its initial value to its final value,  $t_{95} = 12.5$  min), and a leaf with faster acclimation (b;  $t_{95} = 5.8$  min). In each panel, each curve comprises a Rubisco carboxylation-limited segment (solid lines) and an RuBP regeneration-limited segment (dashed lines), and four curves are shown, each corresponding to a different time after exposure to saturating PPFD (yellow: 1 min; orange: 2.5 min; green: 7.5 min; blue: 15 min).

**Figure 3.** Representative time-courses of  $\text{CO}_2$ - and light-saturated net assimilation rate measured in field-grown plants ( $A_{\text{max}}$ ; a) and carboxylation capacity inferred from dynamic  $A$  vs  $c_i$  curves measured on chamber-grown plants ( $V_{\text{cmax}}$ ; b). The time at which  $A_{\text{max}}$  or  $V_{\text{cmax}}$  rose through 95% of its dynamic range ( $t_{95}$ ) is shown with a vertical grey bar in both panels. Solid black lines indicate model fits (a: Eqn 3; b: Eqn 2); in (b), the dashed and dash-dot lines represent the fast and slow phases of the model for  $V_{\text{cmax}}$  induction, respectively (each adjusted to the same asymptote as the full model).

**Figure 4.** Distribution of values of (a,c)  $t_{95}$  and (b,d)  $t_{75} - t_{25}$ , the time for  $A_{\text{max}}$  (a,b) or  $V_{\text{cmax}}$  (c,d) to increase through 95% of its dynamic range ( $t_{95}$ ), or through the middle 50% of its dynamic range ( $t_{75} - t_{25}$ ). 58 genotypes were studied for (a) and (b), of which 37 had 2-4 replicates; 10 genotypes were studied for (c) and (d), each with 5 replicates. The center line in each box plot indicates the median, the upper and lower bounds of each box indicate the 75th and 25th percentiles, respectively, the whiskers indicate the 90th and 10th percentiles, respectively, and the black circles indicate individual values above or below the latter percentiles. Distributions for all genotypes combined are shown at right.

**Figure 5.** Time-courses for acclimation of normalized  $V_{\text{cmax}}$  for leaves using the lower decile (orange line) and upper decile (blue dashed line) for the time constants,  $\tau_{\text{slow}}$  and  $\tau_{\text{fast}}$ , of the slow and fast phases of  $V_{\text{cmax}}$  acclimation. Blue line:  $\tau_{\text{slow}} = 5.4$  min,  $\tau_{\text{fast}} = 0.54$  min; orange line:  $\tau_{\text{slow}} = 2.6$  min,  $\tau_{\text{fast}} = 0.05$  min.

**Figure 6.** Simulated percent loss of potential total diurnal carbon gain caused by slow acclimation of photosynthesis to fluctuating light. In (a), the baseline for comparison is instantaneous acclimation, and the solid and dashed lines are results using the 10th and 90th percentiles, respectively, of kinetic parameters ( $\tau_{\text{slow}}$  and  $\tau_{\text{fast}}$ , the time constants for the slow and fast phases of acclimation of  $V_{\text{cmax}}$ ) to model acclimation. In (b), the baseline for comparison is the faster-acclimating genotypes represented by solid lines in (a). Black, red, blue and grey lines are simulations at four different canopy depths (0.25, 0.75, 1.5 and 3.0  $\text{m}^2 \text{m}^{-2}$  cumulative leaf area index, respectively). All results are averaged across a spherical leaf angle distribution using Monte Carlo sampling, as described in the main text.

**Figure 7.** Simulated dynamics of net assimilation rate during sunflecks, and the acclimated target value of assimilation rate during shadeflecks, showing that fast-acclimating leaves (red symbols) are actually at a disadvantage relative to slow-acclimating leaves (blue symbols) when sunflecks are long and shadeflecks are short, as in panel (a). Simulations are shown for horizontal leaves at mid-day at two canopy positions: cumulative leaf area indices of (a) 0.25  $\text{m}^2 \text{m}^{-2}$ , and (b) 1.5  $\text{m}^2 \text{m}^{-2}$ . Black symbols are for instantaneous acclimation; red and blue symbols are for "fast" and "slow" acclimation, respectively, which were modeled using the 10th and 90th percentiles, respectively, of parameters for acclimation kinetics ( $\tau_{\text{slow}}$  and  $\tau_{\text{fast}}$ , the time constants for the slow and fast phases, respectively, of acclimation of  $V_{\text{cmax}}$ ). Sunfleck length was the same in all cases (2.0 min), whereas shadefleck length was greater at the lower canopy position to reflect the greater fraction of time spent in shadeflecks by lower-canopy leaves.

## Figures

Figure 1

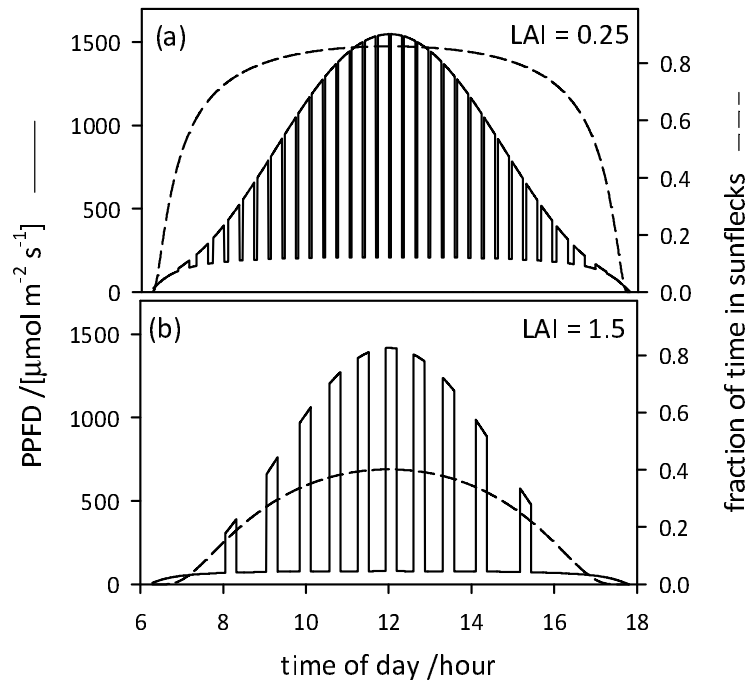

Figure 2

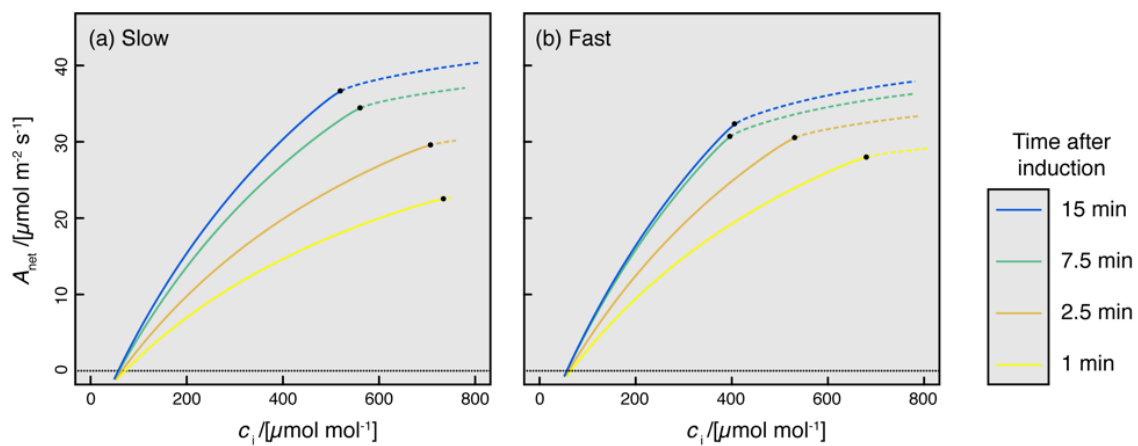



**Figure 3**

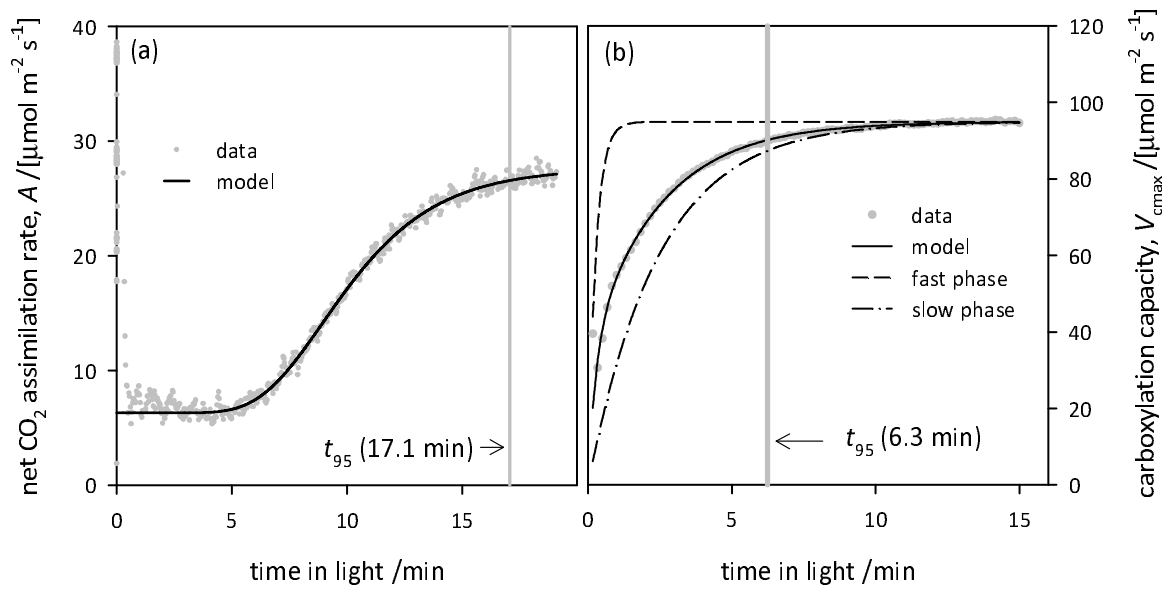

Figure 4

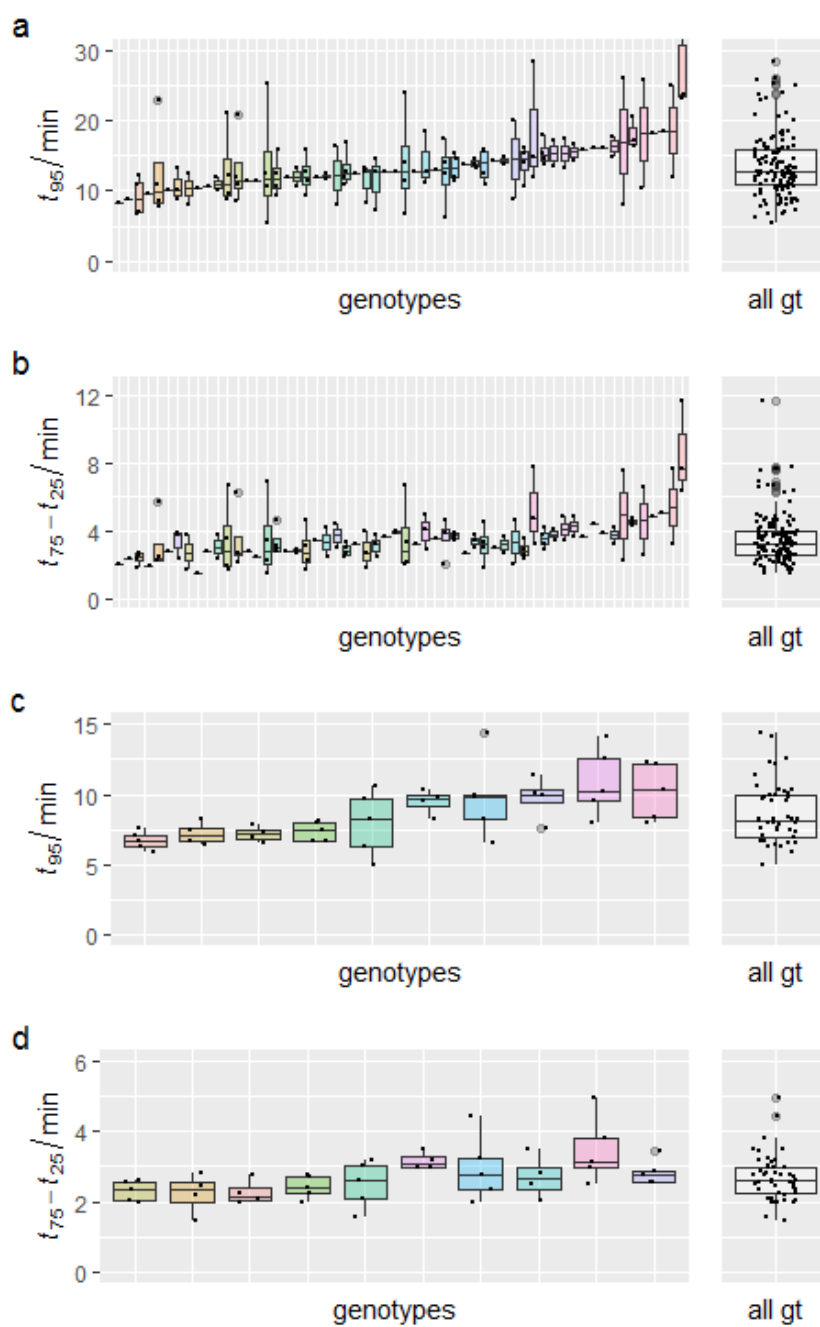

**Figure 5**

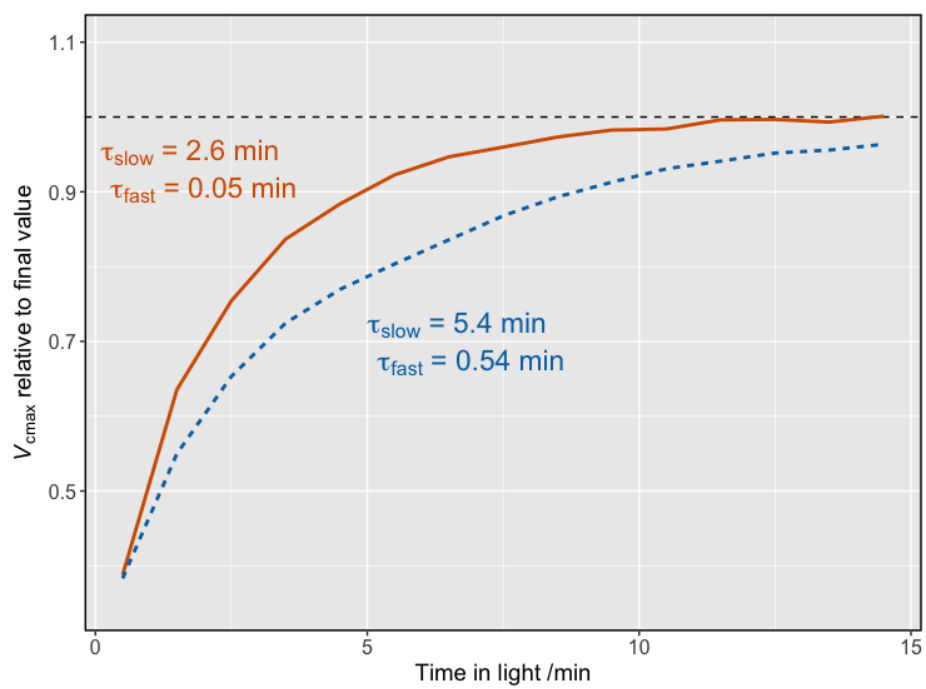

Figure 6

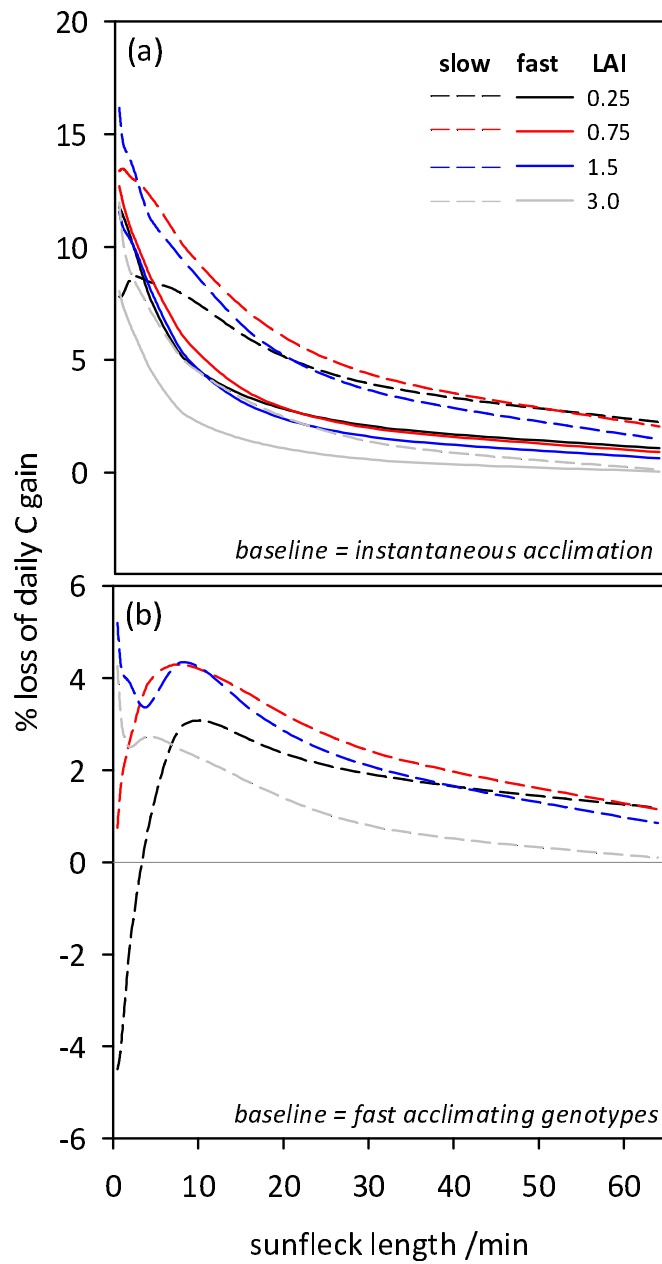

Figure 7

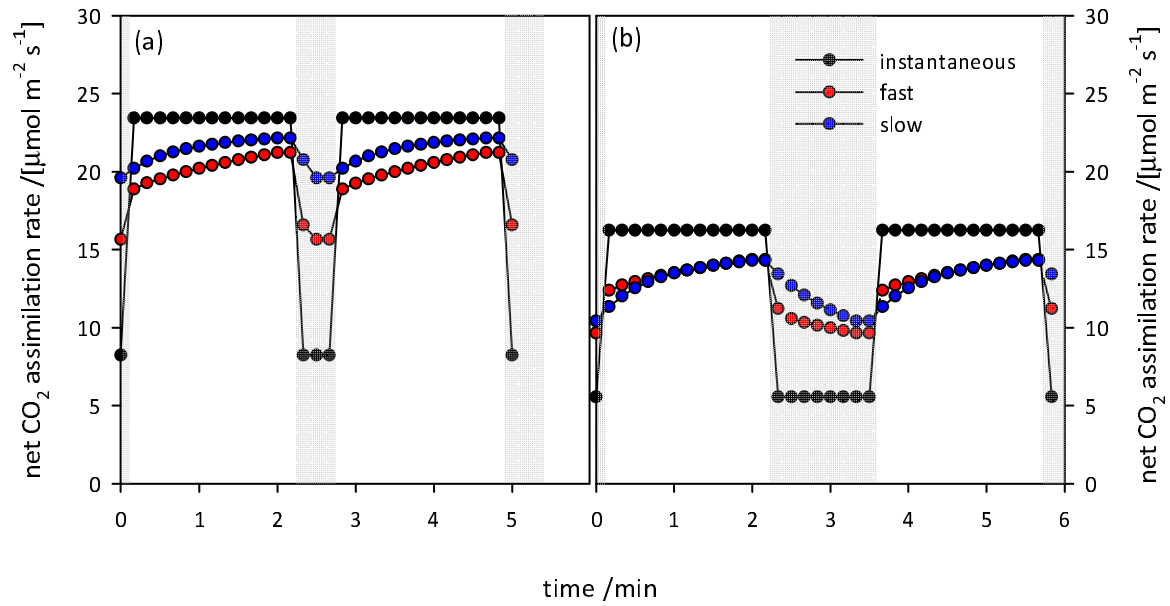

Source: https://www.biorxiv.org/content/10.1101/435834v1.full.pdf
